# Supplementary material for: A cellulolytic fungal biofilm enhances the consolidated bioconversion of cellulose to short chain fatty acids by the rumen microbiome
Source: PubMed Central journal article supplement (PMC6449290; doi:10.1007/s00253-019-09706-1), 2019-03-07
Supplement: 253_2019_9706_MOESM1_ESM.pdf [file 253_2019_9706_MOESM1_ESM.pdf]

1 Online resource file

2 Paper title:

3 A cellulolytic fungal biofilm enhances the consolidated bioconversion of  
4 cellulose to short chain fatty acids by the rumen microbiome

5

6 Journal: Applied Microbiology and Biotechnology

7

8 Authors:

9 Charilaos Xiros<sup>1</sup>, Robert Lawrence Shahab<sup>1,2</sup>, Michael Hans-Peter Studer <sup>1\*</sup>

10

11 Affiliations

12 <sup>1</sup> Laboratory of Biofuels and Biochemicals, School of Agricultural, Forest and Food Sciences,  
13 Bern University of Applied Sciences (BFH), CH-3052 Zollikofen, Switzerland.

14

15 <sup>2</sup> Laboratory of Sustainable and Catalytic Processing, Institute of Chemical Sciences and  
16 Engineering, École Polytechnique Fédérale de Lausanne (EPFL), CH-1015 Lausanne,  
17 Switzerland

18

19 \*Corresponding author: michael.studer1@bfh.ch

20

21

22

23

24

25

26 **Table S1 Changes in the diet of the fistulized cow before and after calving**

|                                                                                         | Before calving         |                      |                     | After calving              |                     |                         |                   |
|-----------------------------------------------------------------------------------------|------------------------|----------------------|---------------------|----------------------------|---------------------|-------------------------|-------------------|
|                                                                                         | ca.15.5.-<br>21.5.2017 | 22.5.-<br>28.05.2017 | 29.05.-<br>7.6.2018 | 8.6.-<br>18.6.2017         | 19.6.-<br>25.6.2017 | 26.6.-<br>2.7.2017      | 3.7.-<br>9.7.2017 |
| Hay                                                                                     | ad lib                 | ad lib               | ad lib              | ad lib                     | ad lib              | ad lib                  | ad lib            |
| Maize cubes<br>(whole plant)<br>(kg/d)                                                  | 0.5                    | 1                    | 1.5                 | 1.5                        | 2                   | 2                       | 2                 |
| Protein<br>concentrate<br>(kg/d)                                                        | 0                      | 0.25                 | 0.5                 | 0.5                        | 1                   | 1.5                     | 1.75              |
| Energy<br>supplementation<br>(Organic acids,<br>vitamins,<br>cereals, sugars)<br>(kg/d) | 0.5                    | 1                    | 1.5                 | 1.5                        | 2                   | 2.5                     | 3.5               |
| <b>Mineral bolus</b>                                                                    | Normal mineral bolus   |                      |                     | Lactation mineral<br>bolus |                     | Normal mineral<br>bolus |                   |

27

28

29

30

31

32

33

34

35

36

37

38

39 **Fig S1 Effect of rumen inoculum volume to final fermentation volume ratio on**  
 40 **SCFAs production.** Different rumen volumes were initially centrifuged, and the pellet  
 41 was resuspended in 250 mL rumen fluid. Thus, in all cases the same volume of fluid  
 42 was inserted in the reactor, but in each case, it contained a different number of  
 43 rumen microorganisms corresponding to the initial rumen fluid volume. The  
 44 fermentations were carried out in duplicate and both replicates are shown

45

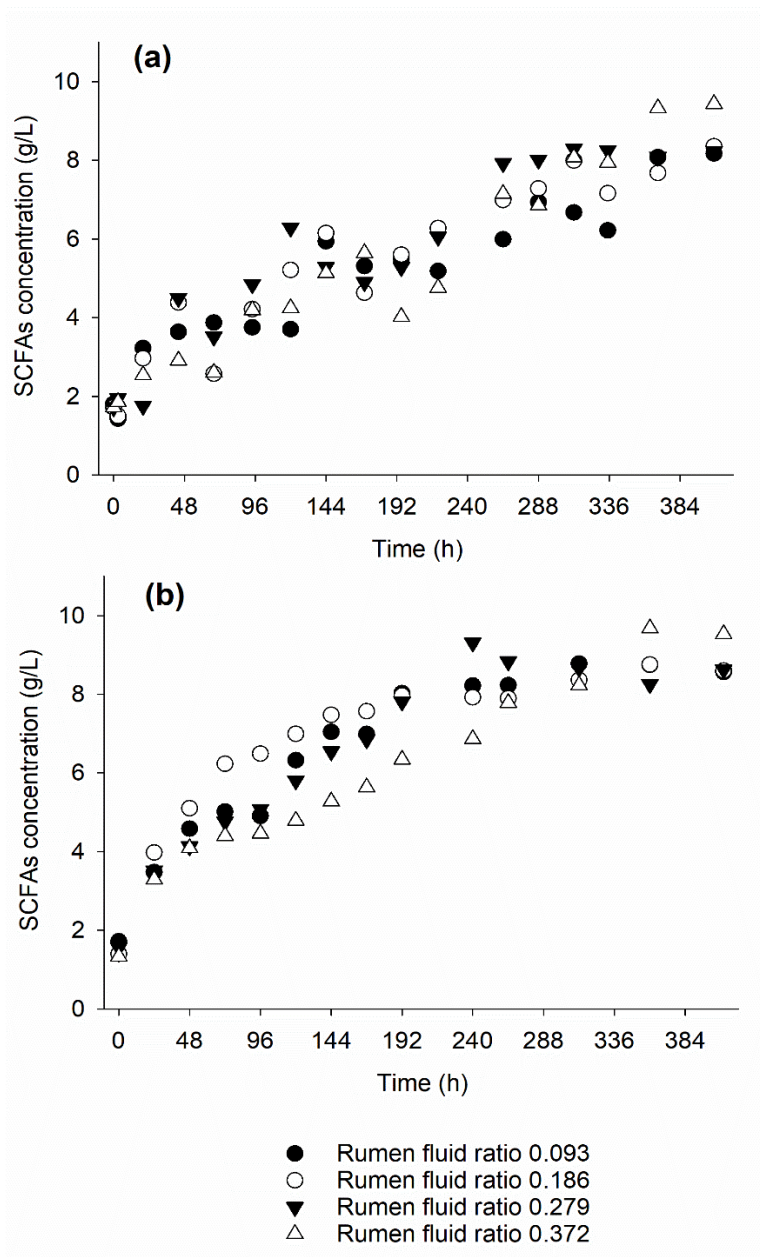

46

47

48 **Fig S2 Evolution of the redox potential in the reactors, with or without the**  
49 **development of a fungal biofilm on the membrane. As zero, at the time scale, the**  
50 **moment of *T. reesei* inoculation is counted.**

51

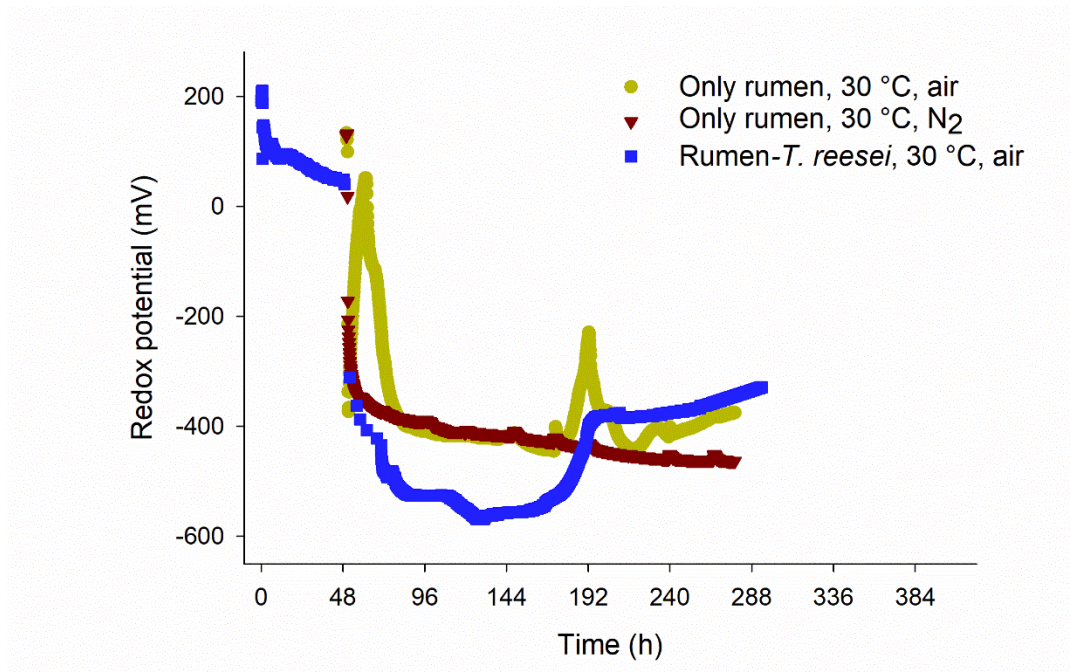

52

53

54

55

56

57

58

59

60

61

62

63 **Fig S3 Methane production in the MBM system with or without the inhibition of the**  
 64 **methanogenic activity.** The accumulated amount produced is shown. BES  
 65 concentration was 5 mM. The membrane was flushed with air during all co-  
 66 cultivations with *T. reesei*.

67

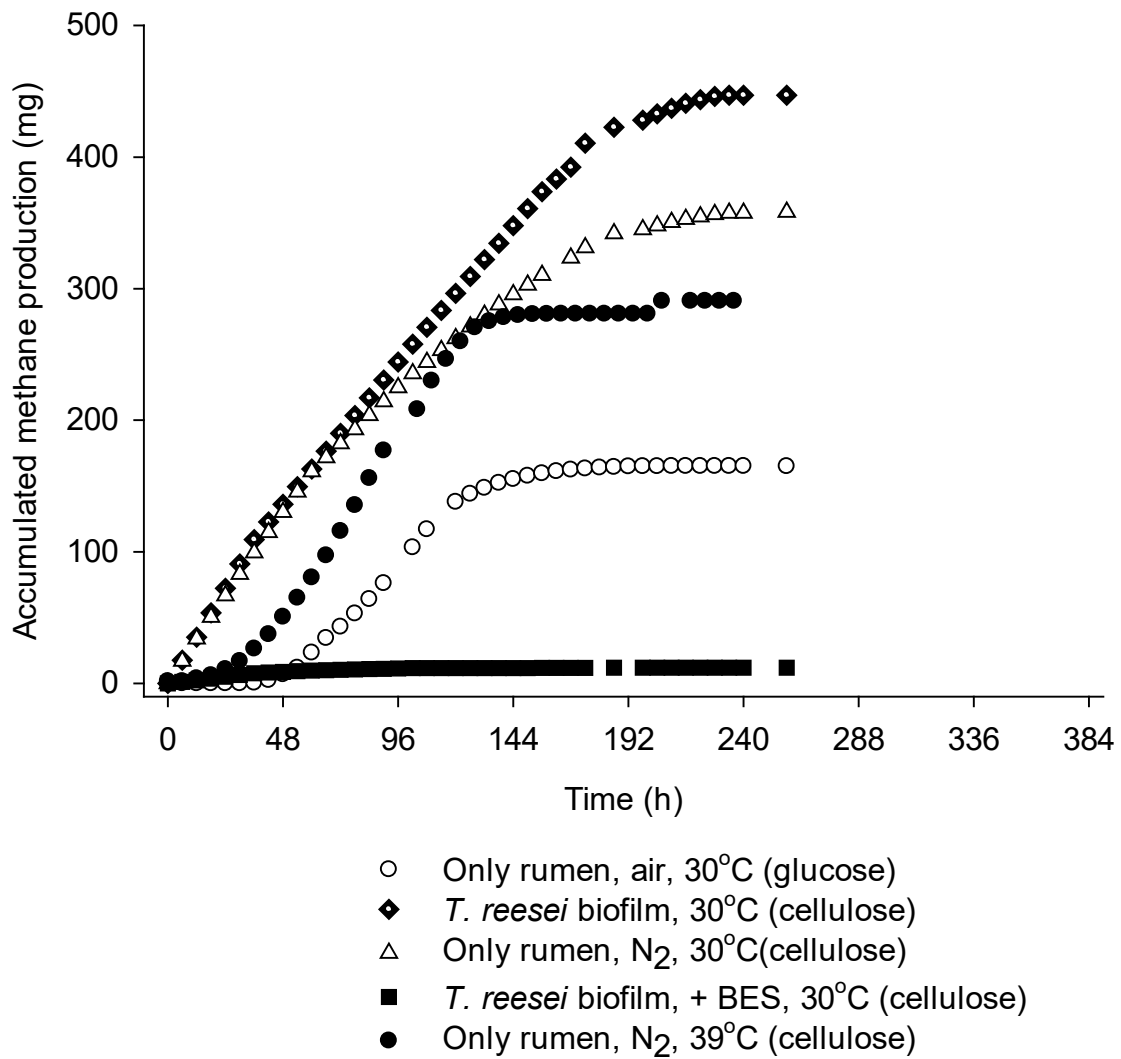

68

69

70

71

72

73 **Fig S4 SCFAs selectivity in the MBM system at different fermentation pH values.** The  
74 selectivity was defined as the ratio of the amount of a SCFA produced to the amount  
75 of total SCFAs (g/g).

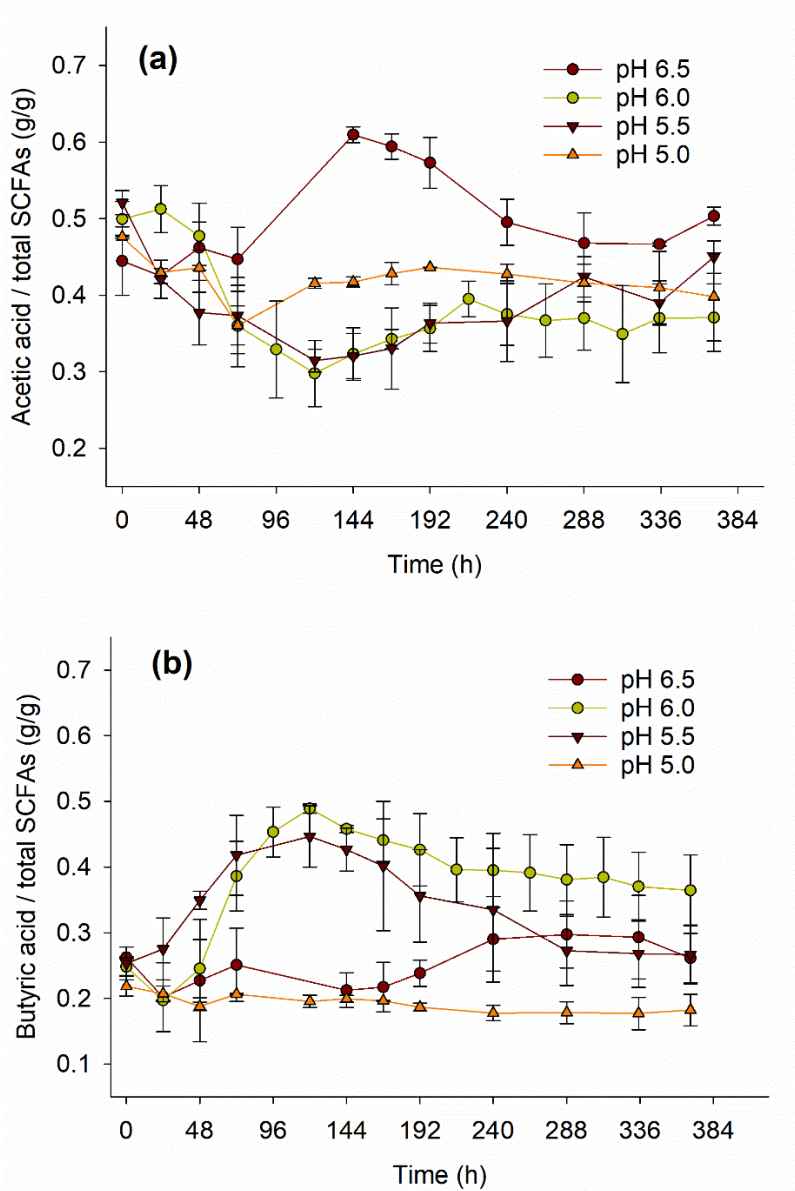

76  
77  
78  
79  
80



81 **Fig S5 SCFAs production at different fermentation temperatures.** Experiments with  
82 *T. reesei* (26°C – 32°C) were performed at pH 6 in duplicate, at different periods of  
83 the year: spring (A) and autumn (B). Crystalline cellulose (1.5 % w/v) was used as the  
84 cellulosic substrate in all cases. The experiment with *C. cinerea* was performed once  
85 during winter. The rumen fluid inoculum volume in all cases was 250 mL (ratio to  
86 total volume 0.093)

87

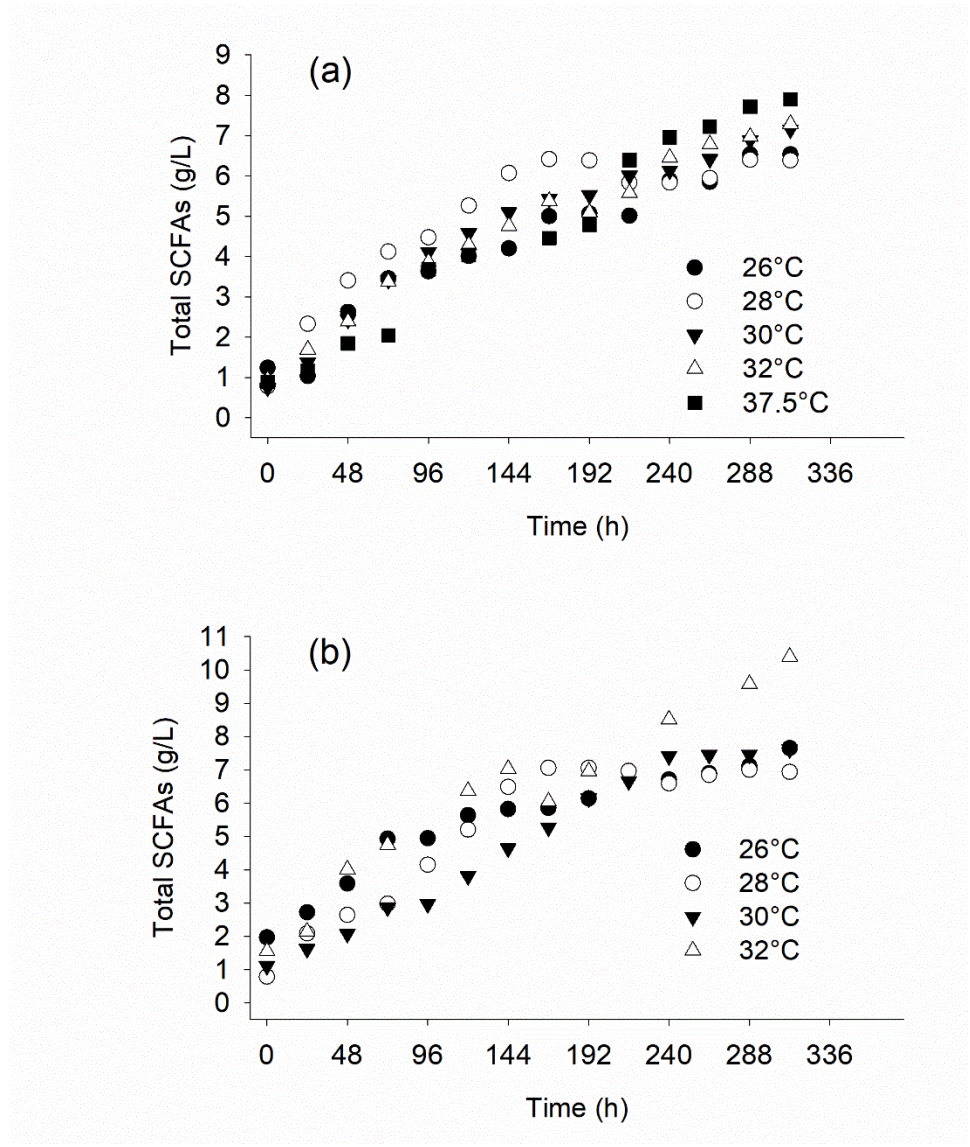

88

89
